# Supplementary material for: Signatures derived from increase in SHARPIN gene copy number are associated with poor prognosis in patients with breast cancer
Source: PubMed Central journal article supplement — BBA Clin. 2017 Aug 24;8:56–65. doi: 10.1016/j.bbacli.2017.07.004 (PMC5582379; doi:10.1016/j.bbacli.2017.07.004), 2017-08-24
Supplement: mmc1.pdf [file mmc1.pdf]

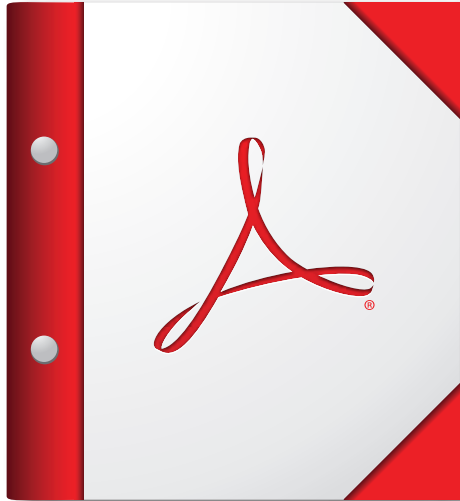

**For the best experience, open this PDF portfolio in  
Acrobat 9 or Adobe Reader 9, or later.**

[Get Adobe Reader Now!](#)
